# Supplementary material
Source: ML conference proceedings conference paper supplement (https://proceedings.neurips.cc/paper_files/paper/2023/hash/1d35af80e775e342f4cd3792e4405837-Abstract.html)
Supplement: Supplementary file 1 [file 1d35af80e775e342f4cd3792e4405837-Supplemental-Conference.zip]

Archive with 2 entries (2 files):
- Appendix.pdf
- GALOPA-CODE.zip
